# Supplementary material for: Precise Integration of Polymeric Sensing Functional Materials within 3D Printed Microfluidic Devices
Source: MDPI journal article supplement (doi:10.3390/chemosensors11040253), 2023-04-19
Supplement: s1 [file s1]

Archive with 1 entries (1 files):
- chemosensors-2296521-supplementary.pdf
